# Supplementary material for: Non-equilibrium organosilane plasma polymerization for modulating the surface of PTFE towards potential blood contact applications
Source: Royal Society of Chemistry journal article supplement (doi:10.1039/c9tb02757b), 2020-01-01
Supplement: c9tb02757b1.pdf [file c9tb02757b1.pdf]

## Supporting information

### **Non-equilibrium organosilane plasma polymerization for modulating the surface of PTFE towards potential blood contact applications**

Vineeth M. Vijayan<sup>a,b</sup>, Bernabe S. Tucker<sup>b</sup>, Patrick T.J. Hwang<sup>d</sup>, Pratheek S. Bobba<sup>c</sup>, Ho-Wook Jun<sup>c</sup>, Shane A. Catledge<sup>a</sup>, Yogesh K. Vohra<sup>a</sup>, Vinoy Thomas<sup>a,b\*</sup>

<sup>a</sup>Center for Nanoscale Materials and Biointegration,

<sup>b</sup>Department of Material Science and Engineering,

<sup>c</sup>Department of Biomedical Engineering,

The University of Alabama at Birmingham, Birmingham, AL 35294, United States

<sup>d</sup>Endomimetics, LLC, Birmingham, Alabama, 35203, United States.

| Samples     | Carbon (%) | Fluorine (%) | Oxygen (%) | Silicon (%) |
|-------------|------------|--------------|------------|-------------|
| PTFE        | 42.1       | 56.0         | 1.9        | -           |
| PTFE-Air 10 | 36.6       | 62.5         | 0.9        | -           |
| PTFE-Air 20 | 37.0       | 62.2         | 0.8        | -           |
| PTFE-Air 30 | 38.8       | 60.2         | 1          | -           |
| PTFE-t10    | 31.2       | 50.5         | 12.4       | 5.9         |
| PTFE-t20    | 23.8       | 25.4         | 34.8       | 16          |
| PTFE-t30    | 26.7       | 34.9         | 26.1       | 12.4        |

Table S1: Table showing the surface elemental percentage (obtained from the X ray photoelectron spectroscopy) of pristine PTFE, silane plasma polymerized PTFE and air plasma treated PTFE surfaces.

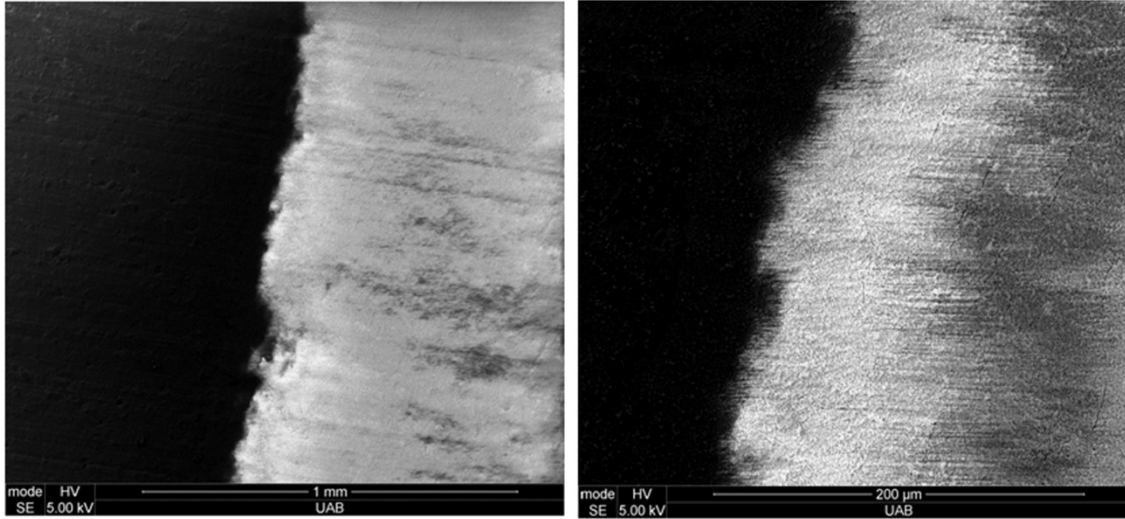

Fig S2: Scanning electron microscopy images of two different areas of PTFE-t10 one region exposed to silane plasma polymerization and the other region without any plasma polymerization.

| No | Composition | Elastic Modulus, GPa | Hardness, GPa     |
|----|-------------|----------------------|-------------------|
| 1  | PTFE        | $0.073 \pm 0.009$    | $0.013 \pm 0.003$ |
| 2  | PTFE-T10    | $0.056 \pm 0.01$     | $0.01 \pm 0.003$  |
| 3  | PTFE-T20    | $0.447 \pm 0.1$      | $0.033 \pm 0.012$ |
| 4  | PTFE-T30    | $0.336 \pm 0.124$    | $0.024 \pm 0.009$ |

Table S3: Nanoindentation Results of PTFE, PTFE-t10, PTFE-t20 and PTFE-t30

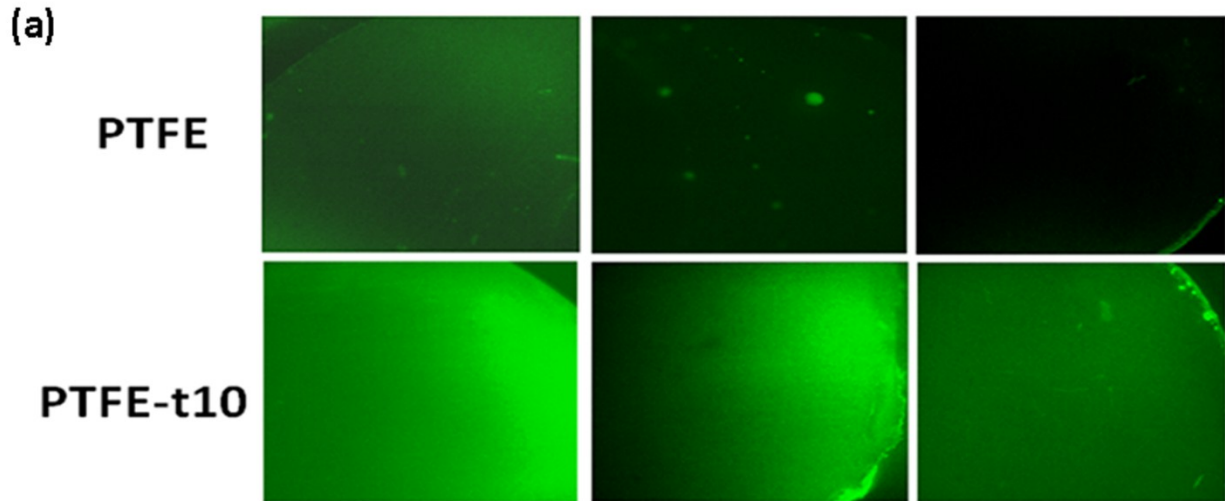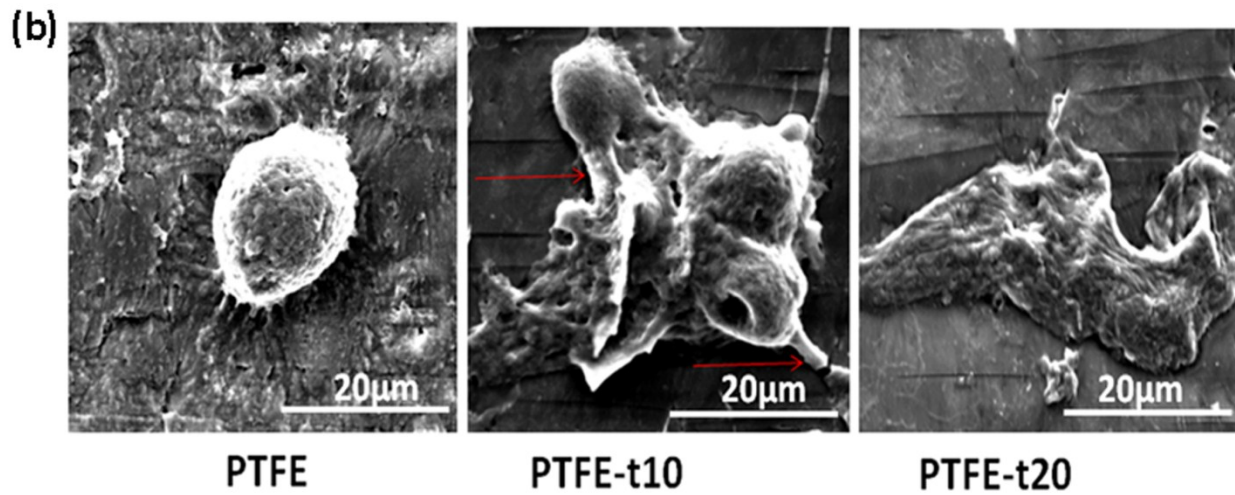

Fig S4: Fluorescent Bovine serum albumin (BSA) adsorption studies on pristine PTFE and PTFE-t10 (a), Scanning electron microscopy images of endothelial cell attached pristine PTFE, PTFE-t10 and PTFE-t20 (the arrows were pointing towards the pseudopods formation)(b).
